# Supplementary material for: Temporal decorrelation by SK channels enables efficient neural coding and perception of natural stimuli
Source: PubMed Central journal article supplement (PMC4837484; doi:10.1038/ncomms11353), 2016-04-18
Supplement: ncomms11353-s1.pdf [file ncomms11353-s1.pdf]

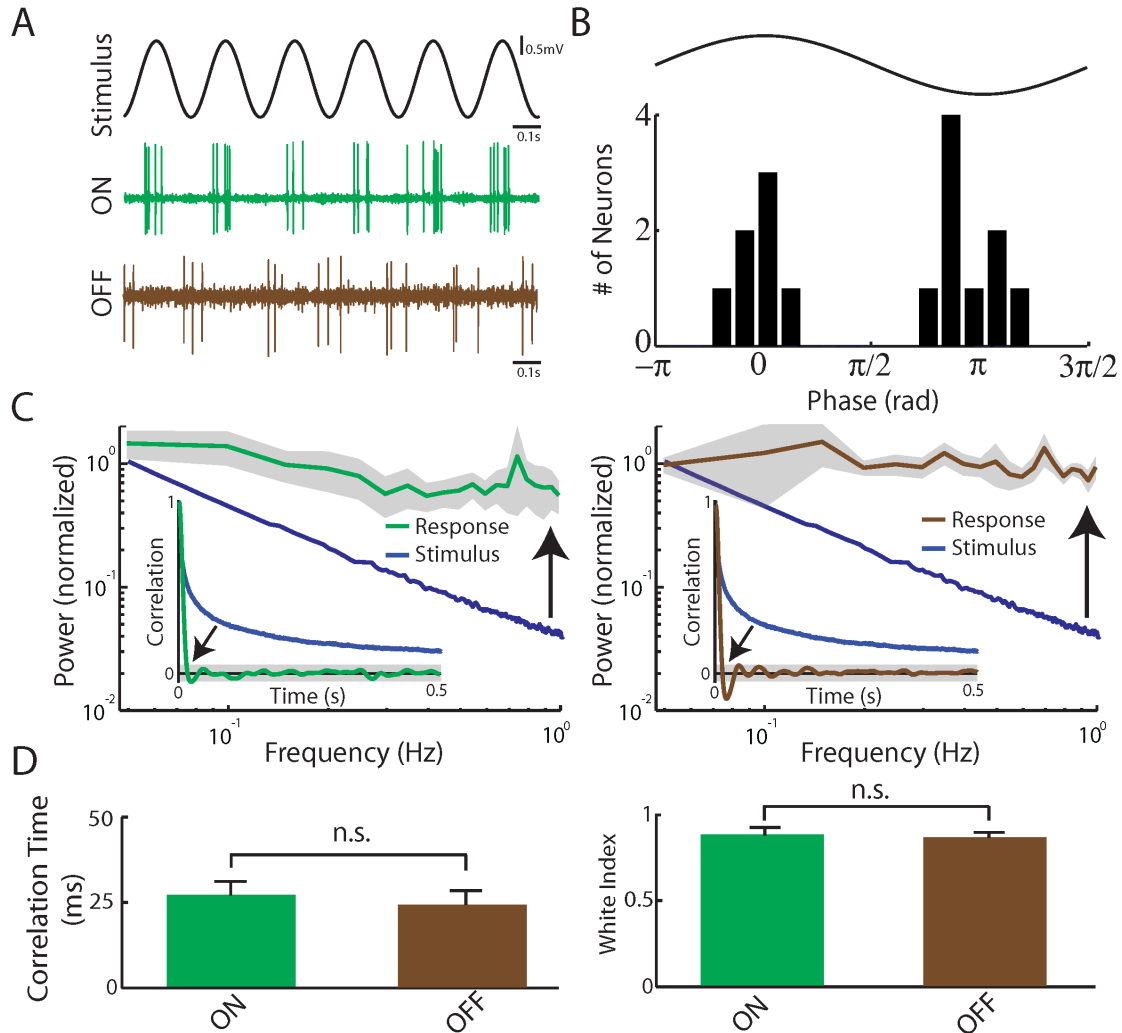

**Supplementary Figure 1:** ON and OFF-type ELL pyramidal cells display similar responses to second order attributes of natural electrosensory stimuli. **A:** Example responses of example ON-type (green) and OFF-type (brown) ELL pyramidal cells to a 4 Hz sinusoidal AM (black). **B:** Distribution of stimulus phase for which ELL pyramidal cells in our dataset fired preferentially. The distribution is clearly bimodal (Hartigan’s dip test,  $p=0.0167$ ) with ON-type cells firing preferentially near the maximum of the stimulus (phase 0) and OFF-type cells firing preferentially near the minimum (phase  $\pi$ ). **C:** The population-averaged response power spectrum (green) for ON (left) and (brown) OFF (right) type cells was relatively constant as compared to that of the envelope stimulus (blue). Insets: The population-averaged response autocorrelation function (green) for ON (left) and (brown) OFF (right) type cells decayed to zero much faster than that of the stimulus (blue). **D:** Population-averaged correlation times (left) and white index (right) for ON (green) and OFF (brown) type cells. No significant differences were observed between correlation time (Wilcoxon rank-sum test,  $p>0.05$ , n.s.,  $N=14$ ) or white index values (Wilcoxon rank-sum test,  $p>0.05$ , n.s.,  $N=14$ ).

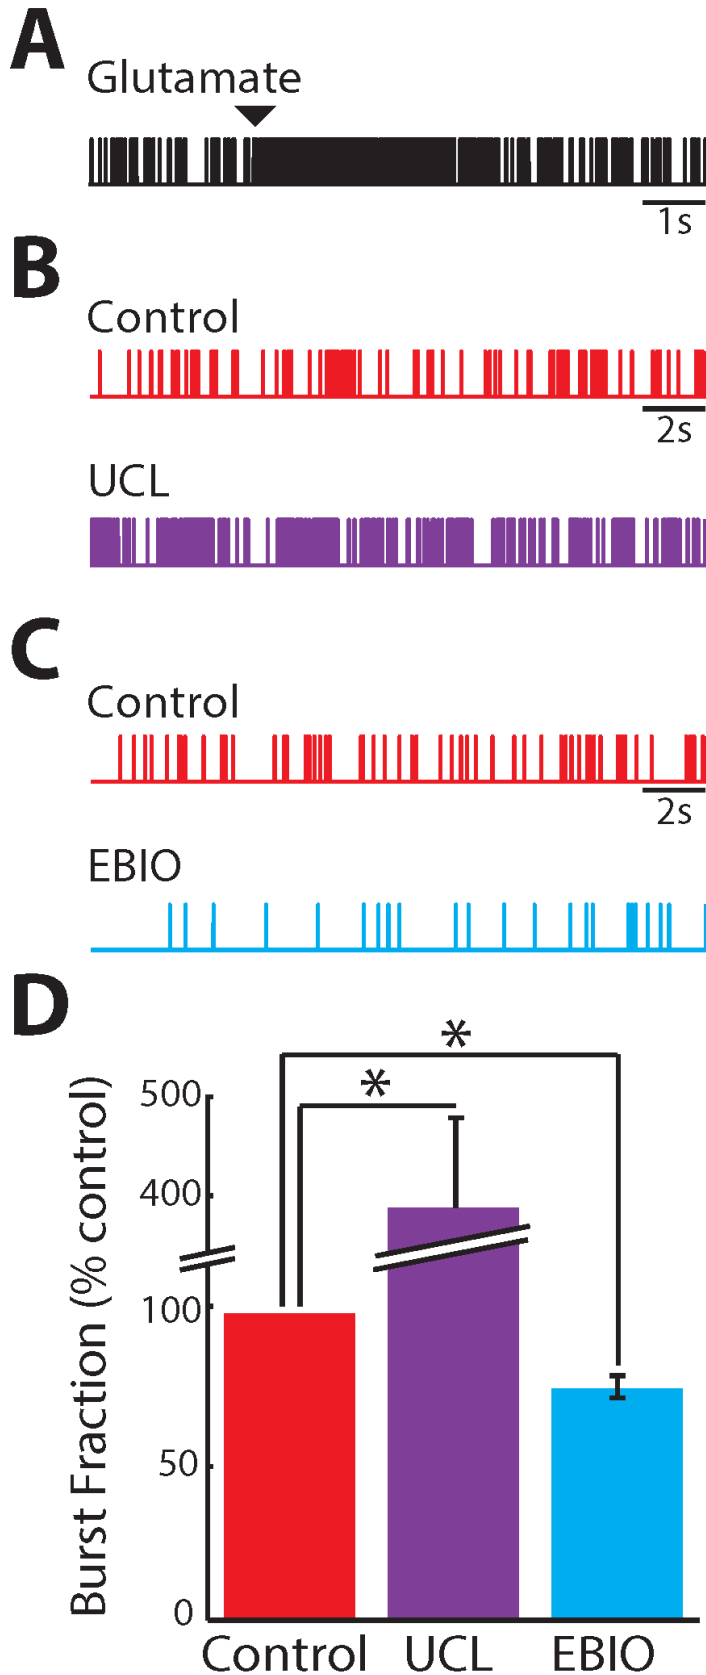

**Supplementary Figure 2:** *UCL and EBIO application have opposite effects on pyramidal neuron baseline activity.* **A)** Glutamate ejection causes rapid increases in pyramidal neuron firing rate, indicating that the pharmacology electrode is close to the neuron from which we are recording. **B)** Baseline activity under control (top) and after UCL application (bottom) from a typical pyramidal neuron. **C)** Same as B for EBIO application. **D)** Population-averaged burst fractions under baseline (control) and after UCL and EBIO application, respectively. Burst fraction was significantly different between control and UCL (Wilcoxon rank-sum test,  $p < 0.05$ ,  $N=6$ ) and between control and EBIO (Wilcoxon rank-sum test,  $p < 0.05$ ,  $N=6$ ).

## A Bi-lateral Saline Injection

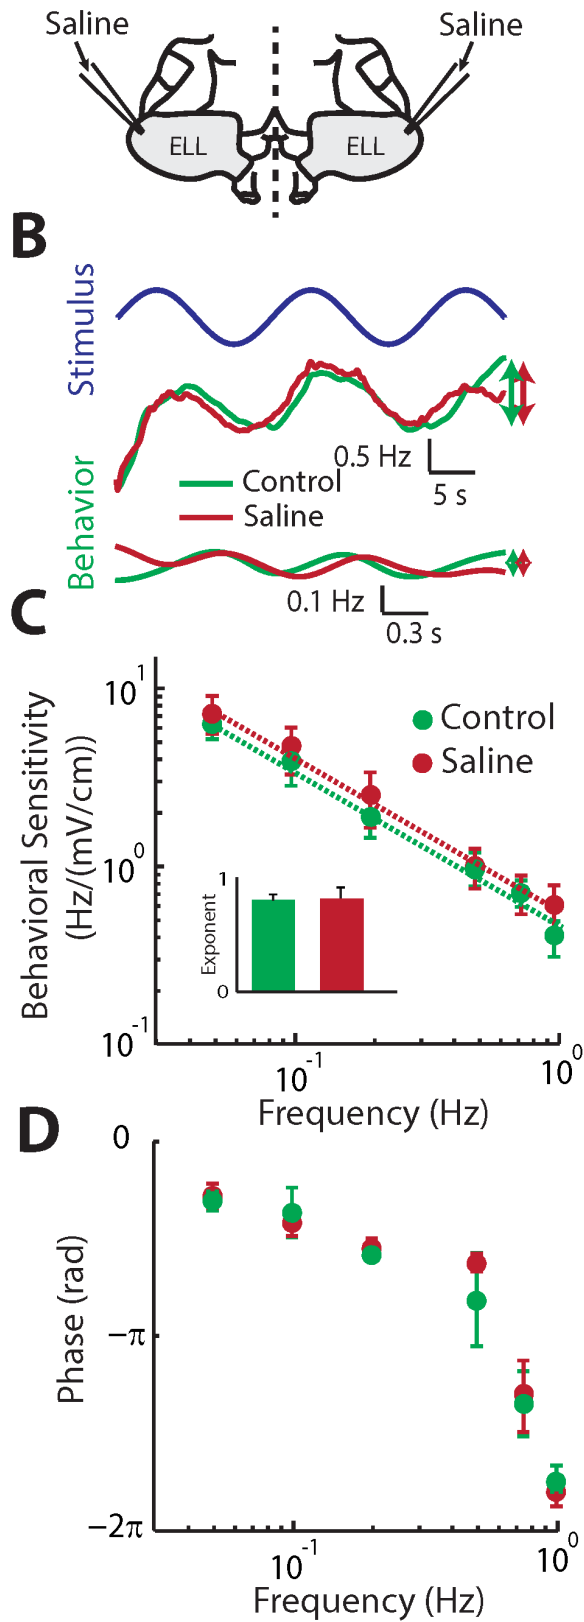

**Supplementary Figure 3: Saline injection does not significantly alter behavioral responses to envelope stimuli.**

**A)** Schematic showing the bilateral saline injection. **B) Top:** Low (left) and high (right) frequency envelope stimuli.

**Bottom:** Corresponding behavioral responses before (green) and after (red) saline injection. **C)** Population-averaged behavioral sensitivity before (green) and after (red) saline injection. The dashed lines show the best power law fits to the data. Inset: Population-averaged power law exponents for before (green) and after saline injection (red) (N=3).

**D)** Population-averaged phase lag before (green) and after (red) saline injection (N=3).
